# Supplementary material for: Blood-Based Protein Changes in Childhood Are Associated With Increased Risk for Later Psychotic Disorder: Evidence From a Nested Case–Control Study of the ALSPAC Longitudinal Birth Cohort
Source: PubMed Central journal article supplement — Schizophr Bull. 2017 Jul 27;44(2):297–306. doi: 10.1093/schbul/sbx075 (PMC5814944; doi:10.1093/schbul/sbx075), 2017-07-27
Supplement: sbx075_suppl_supplementary_tabless1.pdf [file sbx075_suppl_supplementary_tabless1.pdf]

**Supplementary Table 1.** Differential Protein Expression in PD. Label-free discovery proteomic was used to compare age 11 plasma samples from children with an outcome of PD at age 18 with age matched healthy controls (n=75). Sixty proteins were identified as significantly differentially expressed between cases and controls (ANCOVA, P<0.05), following adjustment for gender and BMI as covariates. The gene name, protein name, accession, ANCOVA adjusted p-value, fold change (FC) in disorder, and FDR values are listed for the 181 proteins profiled which are sorted by FDR.

| Protein IDs | Protein names                                              | Gene names | P-value Study_A | FC in PD     | FDR         |
|-------------|------------------------------------------------------------|------------|-----------------|--------------|-------------|
| P01023      | Alpha-2-macroglobulin                                      | A2M        | 2.35E-05        | -1.357158662 | 0.002452739 |
| P22105      | Tenascin-X                                                 | TNXB       | 6.78E-05        | 1.601455999  | 0.003010023 |
| P01871      | Ig mu chain C region                                       | IGHM       | 8.93E-05        | -1.493641497 | 0.003100233 |
| P05452      | Tetranectin                                                | CLEC3B     | 0.000238537     | 1.212187463  | 0.00552715  |
| P06276      | Cholinesterase                                             | BCHE       | 0.000288674     | 1.21666067   | 0.006016202 |
| P06396      | Gelsolin                                                   | GSN        | 0.001184331     | 1.130285152  | 0.013741065 |
| Q16610      | Extracellular matrix                                       | ECM1       | 0.001568137     | 1.226788056  | 0.015289745 |
| P01344      | Insulin-like growth factor                                 | IGF2       | 0.001850386     | 1.261531498  | 0.016146281 |
| P20851      | C4b-binding protein                                        | C4BPB      | 0.001968112     | -1.312726267 | 0.016452583 |
| Q01459      | Di-N-acetylchitobiosaminidase                              | CTBS       | 0.002116574     | 1.232655342  | 0.016804037 |
| P05543      | Thyroxine-binding globulin                                 | SERPINA7   | 0.002123058     | 1.170032058  | 0.016818582 |
| P19320      | Vascular cell adhesion molecule-1                          | VCAM1      | 0.00224966      | 1.335374525  | 0.017090344 |
| P51884      | Lumican                                                    | LUM        | 0.002278966     | 1.190666535  | 0.017150105 |
| P80108      | Phosphatidylinositol-3-OH kinase class I                   | GPLD1      | 0.002346146     | 1.419719297  | 0.017282941 |
| Q14520      | Hyaluronan-binding protein                                 | HABP2      | 0.00253835      | 1.168744992  | 0.017633778 |
| P01860      | Ig gamma-3 chain C region                                  | IGHG3      | 0.002874794     | -1.271699434 | 0.018546284 |
| P49908      | Selenoprotein P                                            | SEPP1      | 0.003146451     | 1.210902508  | 0.019193243 |
| P08603      | Complement factor H                                        | CFH        | 0.003414262     | 1.131441615  | 0.019765573 |
| P36955      | Pigment epithelium-derived factor                          | SERPINF1   | 0.003757244     | 1.128492794  | 0.020478654 |
| Q28107      | Coagulation factor V                                       | F5         | 0.004067608     | 1.265869257  | 0.021055629 |
| P00740      | Coagulation factor I                                       | F9         | 0.004334224     | 1.132273     | 0.021506866 |
| P17936      | Insulin-like growth factor binding protein-3               | IGFBP3     | 0.007644758     | 1.172841072  | 0.032388279 |
| P00748      | Coagulation factor X                                       | F12        | 0.007824123     | 1.192912488  | 0.032887687 |
| P00746      | Complement factor D                                        | CFD        | 0.008444673     | 1.3528744    | 0.034556546 |
| P05156      | Complement factor C1                                       | CFI        | 0.01000394      | 1.116502772  | 0.038384337 |
| P13473      | Lysosome-associated membrane protein 2                     | LAMP2      | 0.011818701     | 1.187366493  | 0.042278849 |
| Q9NQ79      | Cartilage acidic protein 1                                 | CRTAC1     | 0.012282688     | 1.234001136  | 0.043191407 |
| Q15113      | Procollagen C-endopeptidase                                | PCOLCE     | 0.012858287     | 1.188936412  | 0.044281235 |
| P43652      | Afamin                                                     | AFM        | 0.014449995     | 1.123182306  | 0.047073157 |
| P00747      | Plasminogen; Plasminogen activator inhibitor-1             | PLG        | 0.014808888     | 1.138178862  | 0.047661475 |
| P12111      | Collagen alpha-3(VI)                                       | COL6A3     | 0.015123384     | 1.347915835  | 0.048165492 |
| P10643      | Complement component C7                                    | C7         | 0.015253718     | 1.142610485  | 0.048371296 |
| P02652      | Apolipoprotein A-II                                        | APOA2      | 0.015768185     | -1.348607823 | 0.04916664  |
| Q6YHK3      | CD109 antigen                                              | CD109      | 0.016302896     | 1.230950957  | 0.049965576 |
| P63261      | Actin, cytoplasmic 2                                       | ACTG1      | 0.018428441     | 1.233446863  | 0.052893098 |
| P08571      | Monocyte chemoattractant protein 1                         | CD14       | 0.018648336     | 1.136801315  | 0.053174876 |
| P03952      | Plasma kallikrein; Plasminogen activator inhibitor-1       | KLKB1      | 0.019913521     | 1.114899733  | 0.054727224 |
| P01042      | Kininogen-1; Kininogen                                     | KNG1       | 0.021034485     | 1.10538579   | 0.056011644 |
| P12259      | Coagulation factor V                                       | F5         | 0.021375886     | 1.139897032  | 0.056387118 |
| P08697      | Alpha-2-antiplasmin                                        | SERPINF2   | 0.024325249     | 1.08556435   | 0.059359685 |
| P09871      | Complement C1s subunit                                     | C1S        | 0.024366318     | 1.116628231  | 0.059397936 |
| P00734      | Prothrombin; Activated partial thromboplastin time reagent | F2         | 0.024740545     | 1.118890702  | 0.059742847 |
| P06727      | Apolipoprotein A-IV                                        | APOA4      | 0.025696266     | 1.126123234  | 0.06059494  |
| A0A075B6R1  | Ig kappa chain V-II                                        | IGKV2D-40  | 0.025902708     | -1.197827064 | 0.060773775 |

|        |                                   |             |              |             |
|--------|-----------------------------------|-------------|--------------|-------------|
| Q9Y5Y7 | Lymphatic vessel en LYVE1         | 0.026443479 | 1.237467097  | 0.061233787 |
| P00488 | Coagulation factor $\gamma$ F13A1 | 0.027407334 | 1.140692279  | 0.062086047 |
| P05109 | Protein S100-A8;Prc S100A8        | 0.030888404 | 1.236001328  | 0.065695246 |
| P15144 | Aminopeptidase N ANPEP            | 0.0309186   | 1.216601275  | 0.065724624 |
| P04004 | Vitronectin;Vitronec VTN          | 0.031818888 | 1.09696493   | 0.066586457 |
| P04003 | C4b-binding protein C4BPA         | 0.034467678 | -1.166388626 | 0.068973447 |
| P02749 | Beta-2-glycoprotein APOH          | 0.035328247 | 1.129619853  | 0.069704633 |
| P13671 | Complement compc C6               | 0.036921822 | 1.100037012  | 0.071005866 |
| P00736 | Complement C1r su C1R             | 0.036973675 | 1.129197618  | 0.071047102 |
| P10909 | Clusterin;Clusterin t CLU         | 0.037047254 | 1.092045189  | 0.071105499 |
| P49747 | Cartilage oligomeric COMP         | 0.038053607 | 1.265083703  | 0.071890747 |
| P22792 | Carboxypeptidase NCPN2            | 0.039032542 | 1.112846437  | 0.072631307 |
| Q15848 | Adiponectin ADIPOQ                | 0.041918376 | 1.282973847  | 0.076309891 |
| O75882 | Attractin ATRN                    | 0.045675287 | 1.094340508  | 0.080866377 |
| Q6EMK4 | Vasorin VASN                      | 0.047805918 | 1.145119941  | 0.083340993 |
| Q99969 | Retinoic acid recept RARRES2      | 0.048852426 | 1.152447014  | 0.084528878 |
| B9A064 | Immunoglobulin lan IGLL5          | 0.0506578   | -1.192085837 | 0.086536941 |
| Q15582 | Transforming growt TGFBI          | 0.057806133 | 1.239540463  | 0.095039108 |
| P08185 | Corticosteroid-bindi SERPINA6     | 0.059739231 | 1.095566171  | 0.097229706 |
| P07195 | L-lactate dehydroge LDHB          | 0.061424158 | 1.164721629  | 0.099103454 |
| P02774 | Vitamin D-binding p GC            | 0.064698745 | 1.110597891  | 0.102653427 |
| P23470 | Receptor-type tyros PTPRG         | 0.066642837 | -1.11700392  | 0.104705783 |
| P05546 | Heparin cofactor 2 SERPIND1       | 0.071480352 | 1.099233728  | 0.109642913 |
| P04196 | Histidine-rich glycoç HRG         | 0.075353446 | 1.127000204  | 0.113430114 |
| Q06033 | Inter-alpha-trypsin i ITIH3       | 0.079216971 | 1.133640818  | 0.117069912 |
| P02753 | Retinol-binding prot RBP4         | 0.080367507 | 1.196574516  | 0.118128292 |
| P04278 | Sex hormone-bindin SHBG           | 0.080684743 | 1.172512096  | 0.118418109 |
| P15169 | Carboxypeptidase NCPN1            | 0.086141769 | 1.115231913  | 0.124034721 |
| O00391 | Sulfhydryl oxidase 1 QSOX1        | 0.088654122 | 1.132426319  | 0.126549701 |
| P26927 | Hepatocyte growth MST1            | 0.103282873 | 1.13451908   | 0.141887051 |
| P02452 | Collagen alpha-1(I) c COL1A1      | 0.105970957 | 1.205845129  | 0.144580739 |
| P19823 | Inter-alpha-trypsin i ITIH2       | 0.111579366 | 1.060217584  | 0.150083475 |
| P55056 | Apolipoprotein C-IV APOC4         | 0.112926057 | 1.219873985  | 0.151381738 |
| P22891 | Vitamin K-depender PROZ           | 0.118295087 | 1.259472458  | 0.156471654 |
| P07359 | Platelet glycoprotei GP1BA        | 0.126005641 | 1.10389295   | 0.163549144 |
| P02654 | Apolipoprotein C-I;T APOC1        | 0.129643686 | 1.141348035  | 0.16679725  |
| Q9UGM5 | Fetuin-B FETUB                    | 0.133605304 | 1.1361884    | 0.170270143 |
| P04180 | Phosphatidylcholine LCAT          | 0.134807713 | 1.130696651  | 0.171311272 |
| Q04756 | Hepatocyte growth HGFAC           | 0.144138266 | 1.10680323   | 0.179371213 |
| Q9UK55 | Protein Z-dependen SERPINA10      | 0.148681289 | 1.139050262  | 0.183175822 |
| Q92820 | Gamma-glutamyl hy GGH             | 0.150933036 | 1.119891581  | 0.18503353  |
| P29622 | Kallistatin SERPINA4              | 0.158578123 | 1.083724787  | 0.191301967 |
| O43866 | CD5 antigen-like CD5L             | 0.170574837 | -1.197237141 | 0.200744801 |
| O75636 | Ficolin-3 FCN3                    | 0.179020431 | 1.122874971  | 0.2071203   |
| P05154 | Plasma serine prote SERPINA5      | 0.182154333 | 1.147223699  | 0.209431526 |
| P43251 | Biotinidase BTD                   | 0.184924999 | 1.084003139  | 0.211450988 |
| P01031 | Complement C5;Cor C5              | 0.186319558 | 1.054847621  | 0.212459085 |
| P07358 | Complement compc C8B              | 0.195315304 | 1.090993233  | 0.218830867 |
| P07357 | Complement compc C8A              | 0.202650981 | 1.071577616  | 0.223864524 |
| Q96PD5 | N-acetylmuramoyl-l PGLYRP2        | 0.208005641 | 1.069112662  | 0.227450562 |

|        |                                                 |             |              |             |
|--------|-------------------------------------------------|-------------|--------------|-------------|
| P04275 | von Willebrand factor VWF                       | 0.20810115  | 1.178203779  | 0.227513865 |
| P22352 | Glutathione peroxidase GPX3                     | 0.21191002  | 1.147862335  | 0.230019847 |
| P07360 | Complement component C8G                        | 0.225871459 | 1.06279128   | 0.240172363 |
| P04217 | Alpha-1B-glycoprotein A1BG                      | 0.233413192 | 1.059134875  | 0.245486129 |
| P12955 | Xaa-Pro dipeptidase PEPD                        | 0.234142844 | 1.071432603  | 0.245994088 |
| P02787 | Serotransferrin TF                              | 0.241481413 | 1.074671798  | 0.251044066 |
| Q76LX8 | A disintegrin and metalloproteinase ADAMTS13    | 0.24682425  | 1.109426727  | 0.254654587 |
| P02747 | Complement C1q subunit C1QC                     | 0.262528853 | 1.083497519  | 0.265781288 |
| P00742 | Coagulation factor XIII F10                     | 0.271783484 | 1.148702485  | 0.272145025 |
| P68871 | Hemoglobin subunit HBB                          | 0.272953101 | -1.435794938 | 0.272939403 |
| P01008 | Antithrombin-III SERPINC1                       | 0.274526341 | 1.041755194  | 0.274004466 |
| P01766 | Ig heavy chain V-III region BRO; Ig heavy chain | 0.278853232 | -1.114236875 | 0.277126316 |
| P02760 | Protein AMBP; Alpha-2 macroglobulin AMBP        | 0.280705579 | 1.051244829  | 0.278454592 |
| P01009 | Alpha-1-antitrypsin; SERPINA1                   | 0.293605755 | 1.084895571  | 0.287571348 |
| P00000 | Spiked RT standard_Thermo                       | 0.309194275 | -1.057047503 | 0.298285222 |
| O75015 | Low affinity immunoglobulin FCGR3B; FCGR3       | 0.31170931  | 1.10237462   | 0.299983671 |
| P05160 | Coagulation factor XIII F13B                    | 0.320266579 | 1.043616646  | 0.305701475 |
| Q9Y6R7 | IgGFc-binding protein FCGBP                     | 0.335244823 | 1.147690836  | 0.315487987 |
| P19827 | Inter-alpha-trypsin inhibitor ITIH1             | 0.354198021 | 1.044097253  | 0.327483157 |
| P01834 | Ig kappa chain C region IGKC                    | 0.370264742 | -1.058233658 | 0.337327104 |
| P07996 | Thrombospondin-1 THBS1                          | 0.382787132 | -1.258188382 | 0.34480189  |
| Q14624 | Inter-alpha-trypsin inhibitor ITIH4             | 0.384985026 | 1.036428018  | 0.346096481 |
| P05019 | Insulin-like growth factor IGF1                 | 0.394985846 | 1.112605496  | 0.351923086 |
| P35858 | Insulin-like growth factor IGFALS               | 0.424828188 | 1.043205874  | 0.368708387 |
| P00450 | Ceruloplasmin CP                                | 0.429133229 | 1.041568295  | 0.37105833  |
| P02671 | Fibrinogen alpha chain FGA                      | 0.432817468 | -1.058352169 | 0.373055555 |
| P02751 | Fibronectin; Anaglycan FN1                      | 0.436648001 | 1.110234334  | 0.375118679 |
| P02775 | Platelet basic protein PPBP                     | 0.437289562 | -1.151246258 | 0.375462897 |
| P04114 | Apolipoprotein B-100 APOB                       | 0.44039284  | 1.038216246  | 0.377122565 |
| P27169 | Serum paraoxonase PON1                          | 0.449188456 | -1.08681175  | 0.381778986 |
| O95445 | Apolipoprotein M APOM                           | 0.453064414 | 1.083224264  | 0.383808902 |
| P02765 | Alpha-2-HS-glycoprotein AHSG                    | 0.467026409 | 1.043339005  | 0.391011868 |
| P13796 | Plastin-2 LCP1                                  | 0.470282629 | 1.067543992  | 0.392667595 |
| P01011 | Alpha-1-antichymotrypsin SERPINA3               | 0.473363344 | 1.054023475  | 0.394225814 |
| P48740 | Mannan-binding lectin MASP1                     | 0.475014083 | 1.077444354  | 0.395057469 |
| Q9NPH3 | Interleukin-1 receptor IL1RAP                   | 0.479816366 | 1.078834974  | 0.397463961 |
| P06681 | Complement C2; Complement C2                    | 0.491706422 | -1.076087805 | 0.403340655 |
| P54108 | Cysteine-rich secretory protein CRISP3          | 0.496175238 | 1.070860312  | 0.405519849 |
| P02776 | Platelet factor 4; Platelet factor 4 PF4; PF4V1 | 0.506959932 | -1.127673967 | 0.410713957 |
| P02745 | Complement C1q subunit C1QA                     | 0.522400183 | 1.067748449  | 0.417994228 |
| Q03591 | Complement factor CFHR1                         | 0.523822973 | -1.118388625 | 0.418656049 |
| P02746 | Complement C1q subunit C1QB                     | 0.529120639 | 1.035314964  | 0.421107118 |
| P36980 | Complement factor CFHR2                         | 0.565041702 | 1.061309537  | 0.437196662 |
| P05155 | Plasma protease C1 SERPING1                     | 0.56892977  | -1.027403297 | 0.4388847   |
| POC0L5 | Complement C4-B; Complement C4B                 | 0.577995264 | 1.058004386  | 0.442781506 |
| Q96KN2 | Beta-Ala-His dipeptidase CNDP1                  | 0.578925727 | -1.11075503  | 0.443178406 |
| P02790 | Hemopexin HPX                                   | 0.599546602 | 1.023541177  | 0.451831607 |
| P27918 | Properdin CFP                                   | 0.607631973 | 1.057729588  | 0.45515154  |
| P19652 | Alpha-1-acid glycoprotein ORM2                  | 0.608280939 | -1.054836834 | 0.45541627  |
| P04070 | Vitamin K-dependent protein PROC                | 0.609470175 | 1.043927384  | 0.455900722 |

|        |                                      |             |              |             |
|--------|--------------------------------------|-------------|--------------|-------------|
| POC0L4 | Complement C4-A;C C4A                | 0.634783471 | -1.029773529 | 0.466011816 |
| P18428 | Lipopolysaccharide- LBP              | 0.639330457 | 1.055148969  | 0.467788373 |
| P02655 | Apolipoprotein C-II APOC2            | 0.65885384  | 1.062331746  | 0.475283923 |
| P25311 | Zinc-alpha-2-glycopi AZGP1           | 0.678667983 | 1.018577188  | 0.482678274 |
| P33151 | Cadherin-5 CDH5                      | 0.698442312 | -1.034644395 | 0.489852872 |
| O14791 | Apolipoprotein L1 APOL1              | 0.704936558 | -1.054166313 | 0.492165926 |
| POCG06 | Ig lambda-3 chain C IGLC3;IGLC2;IG   | 0.712594153 | 1.04164087   | 0.494866524 |
| P07225 | Vitamin K-depender PROS1             | 0.718218777 | 1.017685898  | 0.496831931 |
| P01019 | Angiotensinogen;An AGT               | 0.72515986  | 1.017292728  | 0.499236364 |
| P02766 | Transthyretin TTR                    | 0.725580943 | 1.037540829  | 0.499381491 |
| B4E1Z4 | Complement factor CFB                | 0.728458692 | 1.017603926  | 0.500371062 |
| P01861 | Ig gamma-4 chain C IGHG4             | 0.732353242 | 1.051937018  | 0.501704068 |
| P02750 | Leucine-rich alpha-2 LRG1            | 0.749146043 | 1.022088706  | 0.507371285 |
| P02647 | Apolipoprotein A-I;F APOA1           | 0.784165493 | -1.021148056 | 0.518784508 |
| P01857 | Ig gamma-1 chain C IGHG1             | 0.811141713 | -1.019949627 | 0.527222082 |
| Q92954 | Proteoglycan 4;Prot PRG4             | 0.844087069 | 1.032418767  | 0.537133746 |
| P59666 | Neutrophil defensin DEFA3;DEFA1      | 0.849271453 | -1.01981551  | 0.538655755 |
| P00738 | Haptoglobin;Haptog HP                | 0.859906398 | -1.042883852 | 0.541746802 |
| O00533 | Neural cell adhesior CHL1            | 0.872500267 | 1.017840309  | 0.545354064 |
| P01623 | Ig kappa chain V-III region WOL;lg k | 0.873764704 | -1.011570803 | 0.545713102 |
| P16070 | CD44 antigen CD44                    | 0.878865793 | -1.018647125 | 0.54715582  |
| P09172 | Dopamine beta-hyd DBH                | 0.885476548 | 1.023777009  | 0.549011934 |
| P01876 | Ig alpha-1 chain C re IGHA1;IGHA2    | 0.890107208 | 1.013476149  | 0.550303057 |
| Q9NZP8 | Complement C1r su C1RL               | 0.91510303  | -1.008415604 | 0.557146693 |
| Q96IY4 | Carboxypeptidase B CPB2              | 0.917867267 | -1.006147565 | 0.557890747 |
| P02763 | Alpha-1-acid glycopi ORM1            | 0.922233348 | -1.019442212 | 0.559060892 |
| P02675 | Fibrinogen beta cha FGB              | 0.925132568 | -1.008842799 | 0.55983449  |
| P02656 | Apolipoprotein C-III APOC3           | 0.934903179 | -1.00930773  | 0.562421709 |
| P01024 | Complement C3;Cor C3                 | 0.93618371  | -1.004933521 | 0.562758536 |
| P61769 | Beta-2-microglobuli B2M              | 0.940037794 | -1.006486641 | 0.563769181 |
| P03951 | Coagulation factor X F11             | 0.941328284 | 1.005792166  | 0.564106539 |
| P11226 | Mannose-binding pr MBL2              | 0.957777128 | -1.008484651 | 0.568361306 |
| P02679 | Fibrinogen gamma c FGG               | 0.9585182   | 1.003833176  | 0.568551042 |
| P02743 | Serum amyloid P-co APCS              | 0.976317303 | 1.002070519  | 0.57305854  |
| P02748 | Complement compc C9                  | 0.98153698  | 1.00149053   | 0.574362581 |
| P02649 | Apolipoprotein E APOE                | 0.982318946 | 1.001918364  | 0.574557256 |
